# Supplementary material for: Synthesis of the reported structure of piperazirum using a nitro-Mannich reaction as the key stereochemical determining step
Source: publisher site journal article supplement (doi:10.3762/bjoc.9.200), 2013-08-23
Supplement: Additional file 1 [file 1860-5397-9-200-S1.pdf]

# **Supporting Information**

for

## **Synthesis of the reported structure of piperazirum using a nitro-Mannich reaction as the key stereochemical determining step**

James C. Anderson<sup>\*1</sup>, Andreas S. Kalogirou<sup>1</sup>, Michael J. Porter<sup>1</sup> and Graham J. Tizzard<sup>2,§</sup>

Address: <sup>1</sup>Department of Chemistry, University College London, 20 Gordon Street,  
London, WC1H 0AJ, UK and <sup>2</sup>National Crystallography Service, School of Chemistry,  
University of Southampton, Southampton, SO17 1BJ, UK

Email: James C. Anderson<sup>\*</sup> - [j.c.anderson@ucl.ac.uk](mailto:j.c.anderson@ucl.ac.uk); Graham J. Tizzard<sup>§</sup> -  
[gjt1@soton.ac.uk](mailto:gjt1@soton.ac.uk)

<sup>\*</sup> Corresponding author

<sup>§</sup> Corresponding author for crystallographic results

### **Further experimental and characterisation data**

**(E)-4-Methoxy-N-(2-methylpropylidene)aniline (14):** To a mixture of *p*-anisidine (246 mg, 2.00 mmol) and basic alumina (2.00 g) in CH<sub>2</sub>Cl<sub>2</sub> (10 mL) at –78 °C was added isobutyraldehyde (182 µL, 2.00 mmol) and the mixture stirred for 1 h, then warmed to rt, filtered and evaporated in vacuo to give crude imine **14** (343 mg, 89% pure by <sup>1</sup>H NMR, 86%) as a colourless oil which was used without further purification; IR  $\nu_{\text{max}}$  (thin film) 2962 w (C-H), 2869 w, 1649 m (C=C), 1503 s, 1464 m, 1441 m, 1291 m, 1239 s, 1211 m, 1179 m, 1105 m, 1034 m, 823 m, 759 m cm<sup>-1</sup>; <sup>1</sup>H NMR (600 MHz)  $\delta$  1.18 (6H, d, *J* = 6.9, CH<sub>3</sub>), 2.62 (1H, m, CH(CH<sub>3</sub>)<sub>2</sub>), 3.80 (3H, s, OCH<sub>3</sub>), 6.87 (2H, app. d, *J* = 8.8, ArH), 7.02 (2H, app. d, *J* = 8.8, ArH), 7.73 (1H, d, *J* = 4.9, =CH); <sup>13</sup>C NMR (150 MHz)  $\delta$  19.2 (CH<sub>3</sub>), 34.7 (CH), 55.4 (OCH<sub>3</sub>), 114.1 (CH arom.), 121.7 (CH arom.), 145.3 (Cq arom.), 157.7 (Cq arom.), 169.4 (=CH); *m/z* (EI<sup>+</sup>) 177 (M<sup>+</sup>, 100%), 162 (M<sup>+</sup> – Me, 53%); HRMS: found 177.1144 C<sub>11</sub>H<sub>15</sub>NO requires 177.1148.

**1-(2-(((3*R*\*,4*S*\*)-2,6-Dimethyl-4-nitroheptan-3-yl)amino)-5-methoxyphenyl)-2,2,2-trifluoroethanone (16):** To a solution of nitroalkene **13** (115 mg, 1.00 mmol), in THF (6.0 mL) was added Superhydride<sup>®</sup> (1.10 mL, 1 M in THF, 1.10 mmol) and the mixture stirred for 15 min at rt. The mixture was cooled to –78 °C before the dropwise addition of a solution of freshly prepared imine **14** (345 mg, 2.00 mmol) in THF (6.0 mL). The reaction was stirred for 10 min before the dropwise addition of a solution of CF<sub>3</sub>CO<sub>2</sub>H (230 µL, 3.00 mmol) in THF (2.0 mL). The reaction was stirred for 1 h and then quenched with brine (10 mL) at –78 °C, warmed to rt and extracted with Et<sub>2</sub>O (3 × 10 mL). The combined organics were dried (MgSO<sub>4</sub>) and evaporated in vacuo to give crude  $\beta$ -nitroamine **15**. A sample was taken for <sup>1</sup>H NMR analysis which showed 64% conversion and dr 70:30.

The rest of the crude product was dissolved in CH<sub>2</sub>Cl<sub>2</sub> (5 mL), cooled to 0 °C and trifluoroacetic anhydride (550 µL, 4.00 mmol), pyridine (320 µL, 4.00 mmol) added dropwise, the mixture warmed to rt and stirred for 30 min. The mixture was then washed with 2 M aqueous HCl (3 × 10 mL), brine (10 mL), dried (MgSO<sub>4</sub>) and concentrated in vacuo. Purification by flash column chromatography (petrol ether/Et<sub>2</sub>O 9:1) gave **16** (60 mg, 15%) as a single diastereoisomer and an orange solid; mp 99–100 °C; *R*<sub>f</sub> 0.61 (petrol ether/Et<sub>2</sub>O 9:1); IR  $\nu_{\text{max}}$  (thin film) 3310 br (N-H), 2964 w (C-H), 1652 m (C=O), 1582 m, 1552 m (C=C), 1525 s (N-O), 1468 m, 1421 w, 1372 m (N-O), 1265 m, 1233 m, 1193 m (C-F), 1148 s (C-F), 1117 m, 1045 m cm<sup>-1</sup>; <sup>1</sup>H NMR (600 MHz)  $\delta$  0.89 (3H, d, *J* = 6.7, CH<sub>3</sub>), 0.90 (3H, d, *J* = 6.3, CH<sub>3</sub>), 0.91 (3H, d, *J* = 6.6, CH<sub>3</sub>), 1.04 (3H, d, *J* = 6.8, CH<sub>3</sub>), 1.44 (1H, m, CH<sub>2</sub>), 1.51 (1H, m, CHCH<sub>3</sub>), 1.87 (1H, m, CHCH<sub>3</sub>), 2.09 (1H, ddd, *J*

= 14.6, 11.7, 3.5, CH<sub>2</sub>), 3.78 (3H, s, OCH<sub>3</sub>), 4.10 (1H, ddd, *J* = 10.5, 7.9, 4.6, CHNH), 4.72 (1H, ddd, *J* = 11.7, 7.9, 2.4, CHNO<sub>2</sub>), 6.92 (1H, app. d, *J* = 9.4, ArH), 7.20 (2H, m, ArH), 8.70 (1H, d, *J* = 10.4, NH); <sup>13</sup>C NMR (150 MHz) δ 16.3 (CH<sub>3</sub>), 20.0 (CH<sub>3</sub>), 20.9 (CH<sub>3</sub>), 23.3 (CH<sub>3</sub>), 25.1 (CH(CH<sub>3</sub>)<sub>2</sub>), 30.5 (CH(CH<sub>3</sub>)<sub>2</sub>), 38.4 (CH<sub>2</sub>), 55.7 (OCH<sub>3</sub>), 60.5 (CHNH), 88.2 (CHNO<sub>2</sub>), 110.3 (Cq arom.), 112.5 (q, *J* = 4.6, ArCH), 114.0 (ArCH), 117.2 (q, *J* = 291.0, CF<sub>3</sub>), 128.4 (ArCH), 149.4 (Cq arom.), 150.1 (Cq arom.), 180.3 (q, *J* = 33.3, C=O); <sup>19</sup>F NMR (282 MHz) δ -69.40 (s, CF<sub>3</sub>); *m/z* (EI<sup>+</sup>) 390 (M<sup>+</sup>, 15%), 301 (25%), 274 (100%), 258 (36%); HRMS: found 390.1758, C<sub>18</sub>H<sub>25</sub>F<sub>3</sub>N<sub>2</sub>O<sub>4</sub> requires 390.1761; Anal. calcd. for C<sub>18</sub>H<sub>25</sub>F<sub>3</sub>N<sub>2</sub>O<sub>4</sub>: C, 55.38, H, 6.45, N, 7.18. Found C, 55.43, H, 6.51, N, 6.93%.

**(3*R*\*,4*S*\*)-*N*<sup>3</sup>-(4-Methoxyphenyl)-2,6-dimethylheptane-3,4-diamine (17):** Prepared by an analogous method to **16** using nitroalkene **13** (230 mg, 2.00 mmol), Superhydride<sup>®</sup> (2.20 mmol), imine **14** (708 mg, 4.00 mmol) and CF<sub>3</sub>CO<sub>2</sub>H (460 μL, 6.00 mmol) to give crude β-nitroamine **15**, that was purified by column chromatography (petrol ether/Et<sub>2</sub>O 4:1). To a solution of crude **15** in EtOH (20 mL) and EtOAc (20 mL) was added an aqueous solution of 6 M HCl (6.60 mL, 40.0 mmol), followed by Zn dust (1.30 g, 20.0 mmol) in 3 portions over 1 h. The mixture was stirred vigorously for 1 h before the solvents were removed in vacuo. The residue was neutralised with saturated aqueous Na<sub>2</sub>CO<sub>3</sub>, extracted with EtOAc (3 × 20 mL), washed with brine (10 mL), dried (MgSO<sub>4</sub>) and concentrated in vacuo to leave the crude diamine that was purified by flash column chromatography (CH<sub>2</sub>Cl<sub>2</sub>/MeOH 20:1) and gave diamine **17** (248 mg, 50%) as a single diastereoisomer and a white solid; mp 86–87 °C; *R*<sub>f</sub> 0.29 (DCM/MeOH 20:1); IR ν<sub>max</sub> (thin film) 3374 br (N-H), 2954 m (C-H), 1509 s (C=C), 1465 m, 1230 s, 1178 m, 1039 m, 815 m cm<sup>-1</sup>; <sup>1</sup>H NMR (600 MHz) δ 0.91 (12H, m, CH<sub>3</sub>), 1.21 (2H, m, CH<sub>2</sub>), 1.81 (2H, m, CH(CH<sub>3</sub>)<sub>2</sub>), 1.81 (2H, m, NH<sub>2</sub>), 2.93 (1H, m, CHNH<sub>2</sub>), 3.05 (1H, m, CHNH), 3.15 (1H, br. s, NH), 3.72 (3H, s, OCH<sub>3</sub>), 6.62 (2H, app. d, *J* = 8.7, ArH), 6.73 (2H, app. d, *J* = 8.5, ArH); <sup>13</sup>C NMR (150 MHz) δ 19.1 (CH<sub>3</sub>), 20.6 (CH<sub>3</sub>), 21.2 (CH<sub>3</sub>), 24.3 (CH<sub>3</sub>), 24.6 (CH(CH<sub>3</sub>)<sub>2</sub>), 31.3 (CH(CH<sub>3</sub>)<sub>2</sub>), 41.5 (CH<sub>2</sub>), 50.9 (CHNH<sub>2</sub>), 55.7 (OCH<sub>3</sub>), 65.6 (CHNH), 113.9 (CH arom.), 114.8 (CH arom.), 144.2 (Cq arom.), 151.3 (Cq arom.); *m/z* (EI<sup>+</sup>) 264 (M<sup>+</sup>, 6%), 178 (100%); HRMS: found 264.2196, C<sub>16</sub>H<sub>28</sub>N<sub>2</sub>O requires 264.2196.

**(4*R*\*,5*S*\*)-5-Isobutyl-4-isopropyl-1-(4-methoxyphenyl)imidazolidine-2-thione (22):**

Saturated aqueous NaHCO<sub>3</sub> (2.40 mL) and H<sub>2</sub>O (2.40 mL) were added to a solution of diamine **21** (130 mg, 0.490 mmol) in CH<sub>2</sub>Cl<sub>2</sub> (14 mL) and MeOH (7 mL), stirred for 5 min at rt and then CSCI<sub>2</sub> (55 μL, 0.74 mmol) was added and the mixture stirred for 24 h. Water

(20 mL) was then added and the mixture extracted with CH<sub>2</sub>Cl<sub>2</sub> (3 × 20 mL), dried (MgSO<sub>4</sub>) and evaporated in vacuo to give crude imidazolinethione. Purification by flash column chromatography (petrol ether/EtOAc 4:1) gave imidazolinethione **22** (130 mg, 42%) as a white solid; mp 123–124 °C; *R*<sub>f</sub> 0.53 (petrol ether/EtOAc 4:1); IR  $\nu_{\text{max}}$  (thin film) 3200 br (N-H), 2955 m (C-H), 1612 w, 1515 s (C=O), 1485 m (C=C), 1448 s, 1253 s, 1225 m, 1172 m, 1033 m, 840 m, 808 m cm<sup>-1</sup>; <sup>1</sup>H NMR (600 MHz)  $\delta$  0.77 (3H, d, *J* = 6.6, CH<sub>3</sub>), 0.79 (3H, d, *J* = 6.6, CH<sub>3</sub>), 0.96 (3H, d, *J* = 6.8, CH<sub>3</sub>), 1.05 (3H, d, *J* = 6.6, CH<sub>3</sub>), 1.35 (1H, m, CH<sub>2</sub>CH(CH<sub>3</sub>)<sub>2</sub>), 1.44 (1H, m, CH<sub>2</sub>), 1.49 (1H, m, CH<sub>2</sub>), 1.96 (1H, m, CHCH(CH<sub>3</sub>)<sub>2</sub>), 3.70 (1H, dd, *J* = 8.4, 5.4, CHNH), 3.82 (3H, s, OCH<sub>3</sub>), 4.31 (1H, dt, *J* = 7.9, 5.9, NCHCH<sub>2</sub>), 6.36 (1H, br. s, NH), 6.92 (2H, app. d, *J* = 8.9, ArH), 7.22 (2H, app. d, *J* = 8.9, ArH); <sup>13</sup>C NMR (150 MHz)  $\delta$  19.1 (CH<sub>3</sub>), 20.6 (CH<sub>3</sub>), 21.2 (CH<sub>3</sub>), 24.3 (CH<sub>3</sub>), 24.6 (CH(CH<sub>3</sub>)<sub>2</sub>), 31.3 (CH(CH<sub>3</sub>)<sub>2</sub>), 41.5 (CH<sub>2</sub>), 50.9 (CHNH), 55.7 (OCH<sub>3</sub>), 65.6 (CHNPMP), 113.9 (ArCH), 114.8 (ArCH), 144.2 (ArCq), 151.3 (ArCq); *m/z* (EI<sup>+</sup>) 264 (M<sup>+</sup>, 6%), 178 (100%); HRMS: found 264.2196, C<sub>17</sub>H<sub>26</sub>N<sub>2</sub>OS requires 264.2196; Anal. calcd. for C<sub>17</sub>H<sub>26</sub>N<sub>2</sub>OS: C, 66.62, H, 8.55, N, 9.14. Found C, 66.30, H, 8.60, N, 8.93%.

***N*-((3*R*\*,4*S*\*)-2,6-dimethyl-3-(4-methyl-2-oxopentanamido)heptan-4-yl)-*N*-(4-methoxyphenyl)-4-methyl-2-oxopentanamide (**24**):** To a solution of keto acid **11** (130 mg, 1.00 mmol) in CH<sub>2</sub>Cl<sub>2</sub> (2 mL) was added oxalyl chloride (2.00 equiv, 170  $\mu$ L) and DMF (two drops) and the mixture stirred at rt for 1 h. The solvent and excess oxalyl chloride were then removed in vacuo and a solution of diamine **21** (188 mg, 0.710 mmol) in CH<sub>2</sub>Cl<sub>2</sub> (5 mL) was added, followed by pyridine (1.20 equiv, 97  $\mu$ L) and DMAP (5 mg), and the solution was stirred for 24 h at rt. Water (20 mL) was then added and the mixture extracted with CH<sub>2</sub>Cl<sub>2</sub> (3 × 20 mL), dried (MgSO<sub>4</sub>) and evaporated in vacuo and purification by flash column chromatography (petrol ether/Et<sub>2</sub>O 4:1) gave di-amide **24** (111 mg, 32%) as a colourless oil; *R*<sub>f</sub> 0.23 (petrol ether:Et<sub>2</sub>O 4:1); IR  $\nu_{\text{max}}$  (thin film) 3352 br (N-H), 2958 m (C-H), 1714 m (C=O), 1684 m (C=O), 1649 s (C=O), 1510 s, 1467 m, 1368 m, 1297 m, 1251 m, 1171 m, 1147 m, 1074 m, 1035 m, 831 m cm<sup>-1</sup>; <sup>1</sup>H NMR (600 MHz)  $\delta$  0.71 (3H, d, *J* = 6.6, CH<sub>3</sub>), 0.72 (3H, d, *J* = 6.7, CH<sub>3</sub>), 0.90-1.00 (18H, m, CH<sub>3</sub>), 1.05 (2H, m, CHCH<sub>2</sub>CH), 1.73 (1H, m, CH(CH<sub>3</sub>)<sub>2</sub>), 1.97 (1H, m, CH(CH<sub>3</sub>)<sub>2</sub>), 2.12 (2H, m, CH(CH<sub>3</sub>)<sub>2</sub>), 2.33 (2H, m, CH<sub>2</sub>), 2.72 (2H, m, CH<sub>2</sub>), 3.78 (3H, s, OCH<sub>3</sub>), 3.87 (1H, m, CHNH), 4.83 (1H, br. s, CHNAr), 6.77 (1H, br. d, *J* = 10.9, NHCO), 6.83 (2H, app. d, *J* = 8.7, ArH), 7.03 (2H, app. d, *J* = 8.7, ArH); <sup>13</sup>C NMR (150 MHz)  $\delta$  16.7 (CH<sub>3</sub>), 20.2 (CH<sub>3</sub>), 21.8 (CH<sub>3</sub>), 22.1 (CH<sub>3</sub>),

22.4 (CH<sub>3</sub>), 22.5 (CH<sub>3</sub>), 23.2 (CH<sub>3</sub>), 23.6 (CH<sub>3</sub>), 24.5 (CH), 24.8 (CH)[two CH signals overlapping], 29.2 (CH<sub>2</sub>CHNAr), 36.4 (CHCH<sub>2</sub>CH), 45.2 (CH<sub>2</sub>CO), 49.1 (CH<sub>2</sub>CO), 55.4 (OCH<sub>3</sub>), 55.8 (CHNHCO), 114.5 (CH arom.), 127.3 (Cq arom.), 131.1 (CH arom.), 159.8 (ArNC=O), 160.2 (Cq arom.), 169.3 (NHC=O), 198.6 (CH<sub>2</sub>C=O), 200.2 (CH<sub>2</sub>C=O); *m/z* (Cl<sup>+</sup>) 489 (M + H<sup>+</sup>, 60%), 471 (M + H<sup>+</sup> - H<sub>2</sub>O, 61%), 359 (40%), 93 (100%); HRMS: found 489.3341, C<sub>28</sub>H<sub>45</sub>N<sub>2</sub>O<sub>5</sub> requires 489.3323.
